# Supplementary material
Source: PubMed Central journal article supplement (PMC3685485)
Supplement: NIHMS407589-supplement-7.pdf [file NIHMS407589-supplement-7.pdf]

Transcripts most-highly co-regulated with AKR1C3 (positive association). All P values<0.001.

| GeneSymbol | R value     | R2 value |
|------------|-------------|----------|
| AKR1C3     | 1           | 1        |
| AKR1C1     | 0.94524216  | 0.893483 |
| AKR1C2     | 0.935813053 | 0.875746 |
| AKR1C4     | 0.886756755 | 0.786338 |
| AMIGO2     | 0.675654202 | 0.456509 |
| KIAA1524   | 0.652009626 | 0.425117 |
| LAMB1      | 0.635375713 | 0.403702 |
| IGFBP3     | 0.633829992 | 0.40174  |
| FGD6       | 0.596583273 | 0.355912 |
| CA12       | 0.576259994 | 0.332076 |
| FAR2       | 0.573998341 | 0.329474 |
| IFI27      | 0.573286709 | 0.328658 |
| CKLF       | 0.565635749 | 0.319944 |
| UGT2B17    | 0.563840125 | 0.317916 |
| IL18       | 0.562716898 | 0.31665  |
| LOC728160  | 0.560990592 | 0.31471  |
| UGT2B15    | 0.560990592 | 0.31471  |
| ST3GAL1    | 0.559856832 | 0.31344  |
| OSBPL3     | 0.558727529 | 0.312176 |
| GSDMB      | 0.549991234 | 0.30249  |

Transcripts with the most negative association with AKR1C3. All P values<0.001.

| GeneSymbol   | R value      | R2 value |
|--------------|--------------|----------|
| KLK3         | -0.714317511 | 0.51025  |
| ACPP         | -0.588004506 | 0.345749 |
| ABCC4        | -0.564390637 | 0.318537 |
| KLK2         | -0.562786881 | 0.316729 |
| SORD         | -0.548272897 | 0.300603 |
| ALDH1A3      | -0.540447988 | 0.292084 |
| SORD2        | -0.539934101 | 0.291529 |
| KCND3        | -0.532286485 | 0.283329 |
| ALDH6A1      | -0.531074288 | 0.28204  |
| KLK4         | -0.530894188 | 0.281849 |
| TRPM8        | -0.52814907  | 0.278941 |
| SPDEF        | -0.516511253 | 0.266784 |
| SLC45A3      | -0.513693514 | 0.263881 |
| MSMB         | -0.512995354 | 0.263164 |
| FAM13C       | -0.512252606 | 0.262403 |
| C9orf61      | -0.500806651 | 0.250807 |
| LOC100131110 | -0.495850304 | 0.245868 |
| AZGP1        | -0.484037215 | 0.234292 |
| CHRNA2       | -0.482433479 | 0.232742 |
| TBC1D4       | -0.479306963 | 0.229735 |
